# Supplementary material for: Butterfly wing type new push–pull A–π–D–π–A organic fluorophore: synthesis, photophysical, DFT and nonlinear optical property studies
Source: Royal Society of Chemistry journal article supplement (doi:10.1039/d3nj03252c), 2023-01-01
Supplement: d3nj03252c1.pdf [file d3nj03252c1.pdf]

## Supporting Information

**Butterfly wing type new push-pull A- $\pi$ -D- $\pi$ -A organic fluorophore:**

**Synthesis, photophysical, DFT and nonlinear optical property studies**

*Ananthan Alagumalai<sup>1</sup>, Soumya Shaswati Sahu<sup>2</sup>, Upakarasamy Lourderaj<sup>2</sup>,  
Sai Muthukumar Vijayasayee<sup>3\*</sup>, Ananthanarayanan Krishnamoorthy<sup>1\*</sup>Senthil A.  
Gurusamy Thangavelu<sup>1\*</sup>*

\* Corresponding author

<sup>1</sup>Organic and Perovskite Photovoltaics Laboratory (OPPV), Department of Chemistry, SRM Institute of Science and Technology, Kattankulathur, Tamil Nadu, India. Pin Code – 603203.

<sup>2</sup>School of Chemical Sciences, National Institute of Science Education and Research (NISER) Bhubaneswar, An OCC of Homi Bhabha National Institute, P. O. Jatni, Khurda, Odisha, India – 752050

<sup>3</sup>Department of Physics, Sri Sathya Sai Institute of Higher Learning, Vidyagiri, Prasanthi Nilayam, Andhra Pradesh, India. Pin Code – 515134.

E-mail:

Sai Muthukumar Vijayasayee: [vsaimuthukumar@sssihl.edu.in](mailto:vsaimuthukumar@sssihl.edu.in)

Ananthanarayanan Krishnamoorthy: [ananthak@srmist.edu.in](mailto:ananthak@srmist.edu.in)

Senthil A. Gurusamy Thangavelu: [senthilt1@srmist.edu.in](mailto:senthilt1@srmist.edu.in)

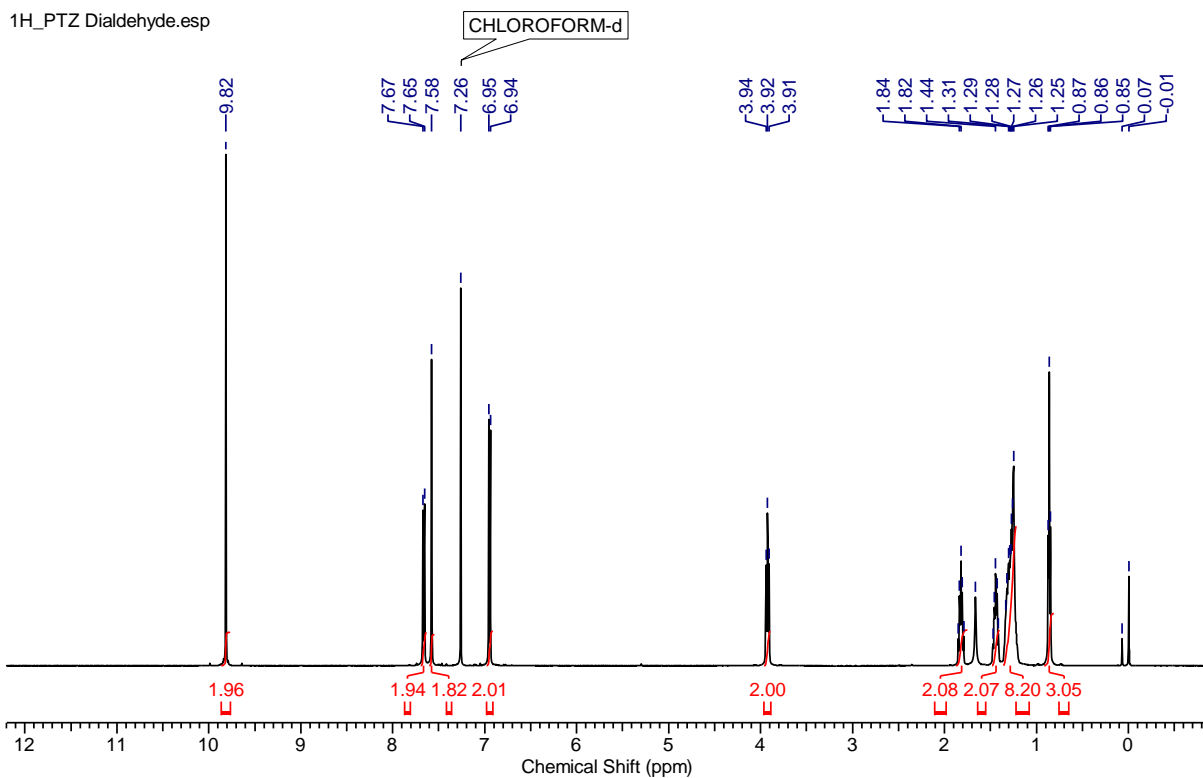

Fig. S1:  $^1\text{H}$ -NMR data of compound 3

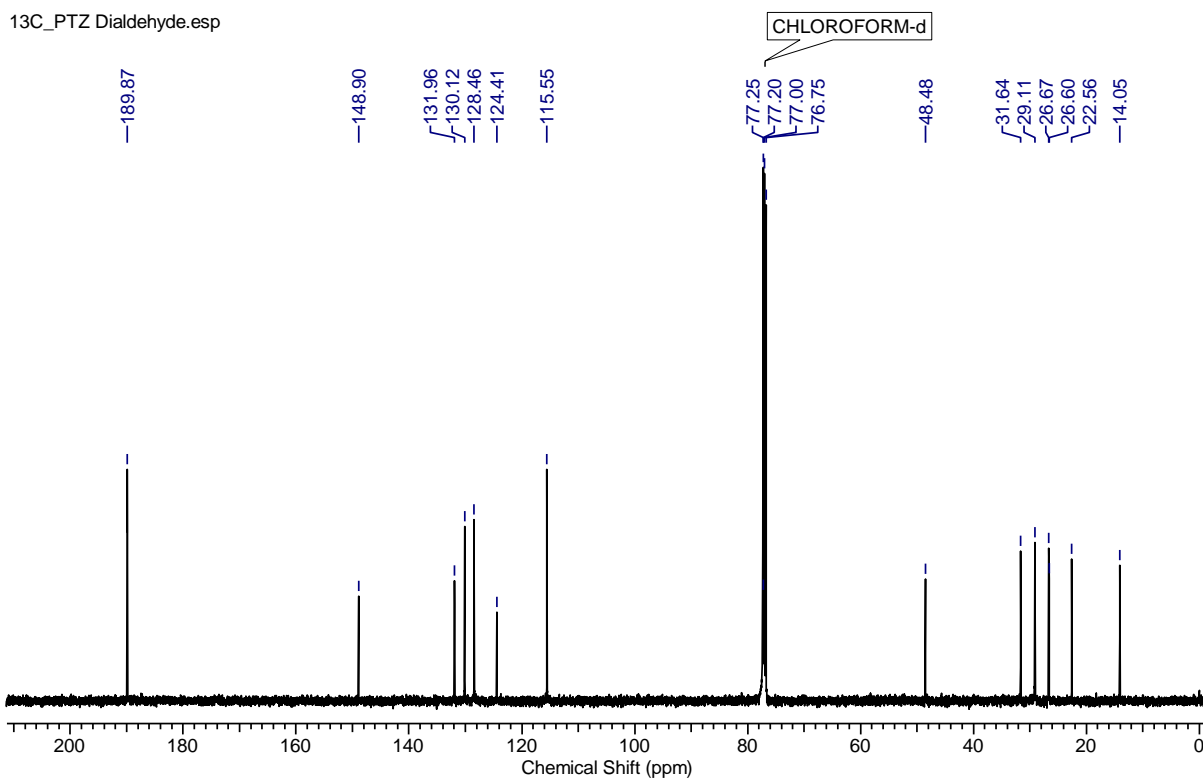

Fig. S2:  $^{13}\text{C}$ -NMR data of compound 3

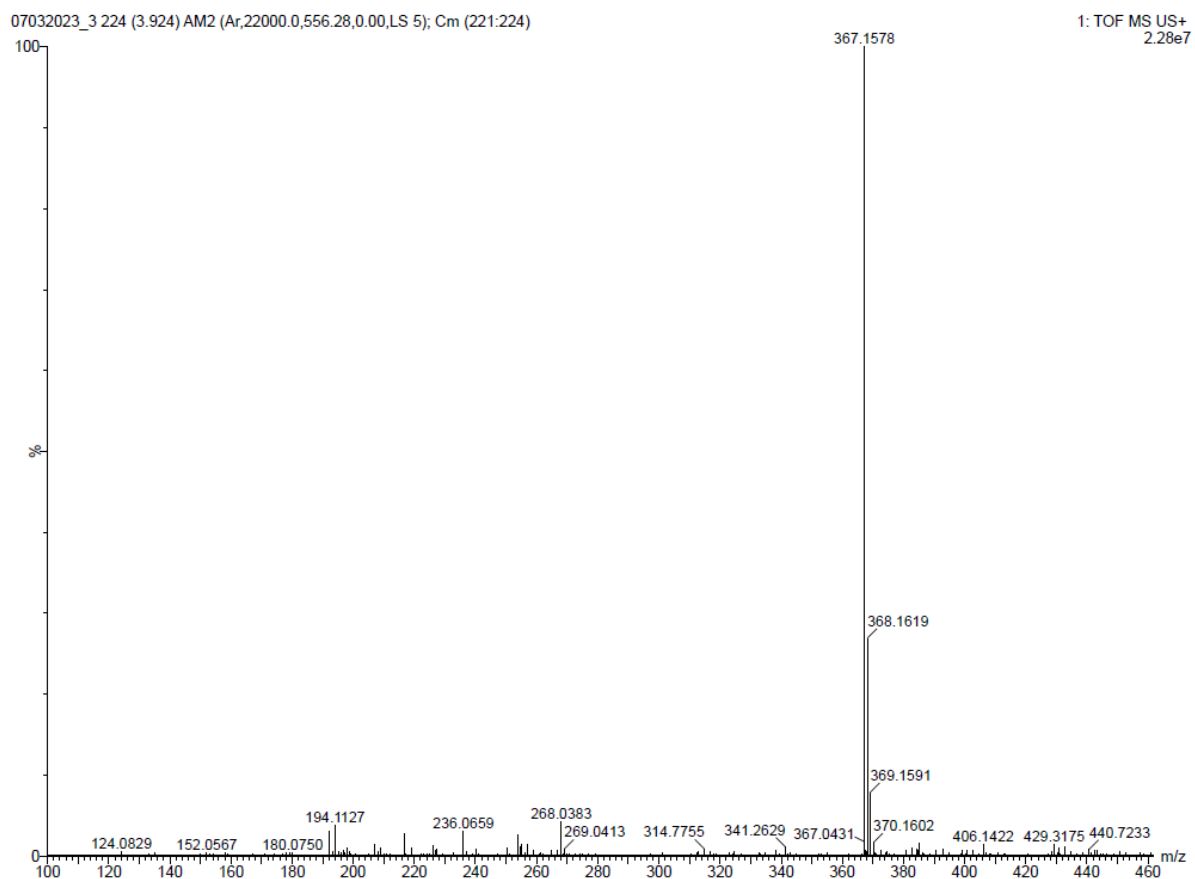

Fig. S3: MALDI-TOF of compound 3

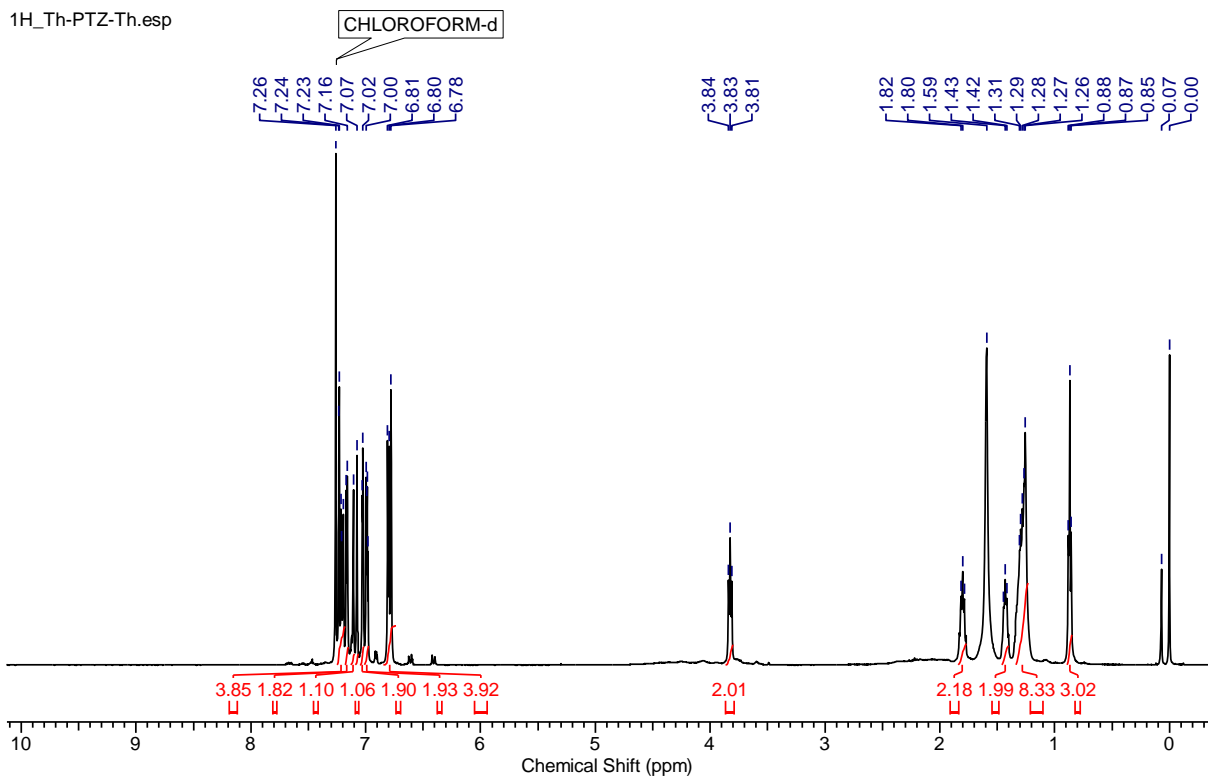

Fig. S4: <sup>1</sup>H-NMR data of compound 4

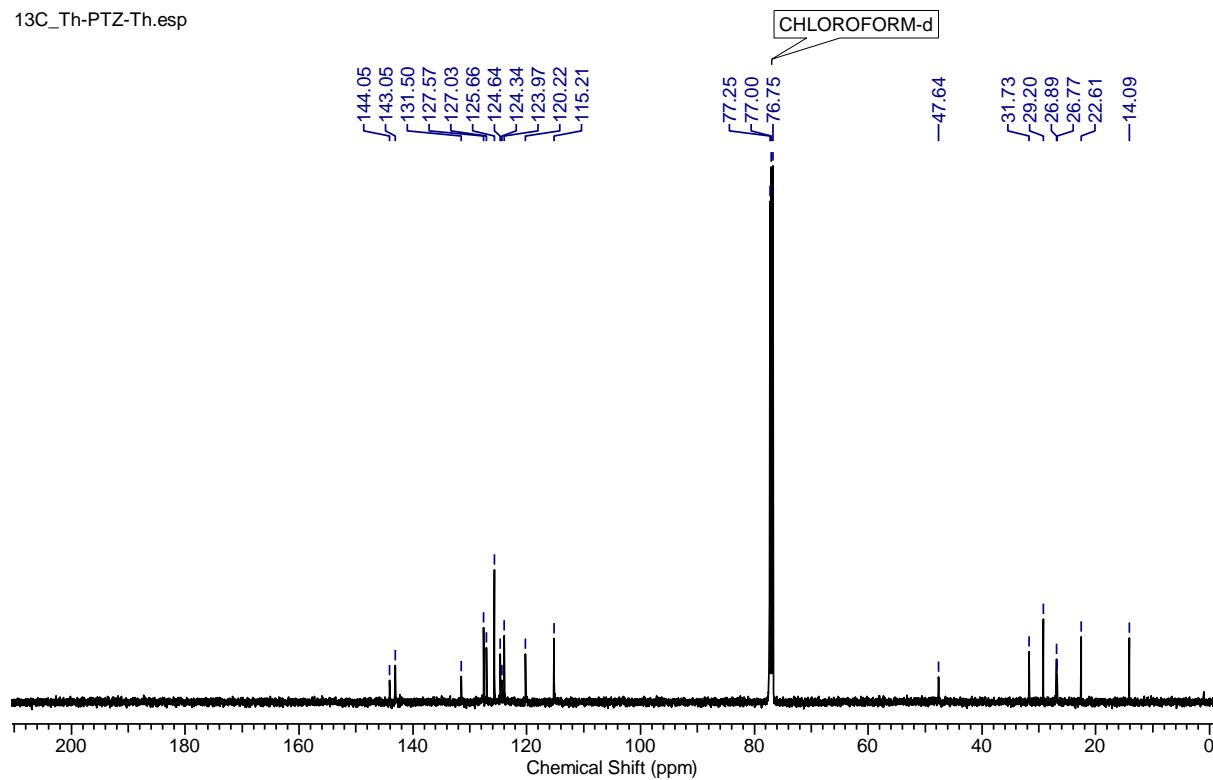

Fig. S5: <sup>13</sup>C-NMR data of compound 4

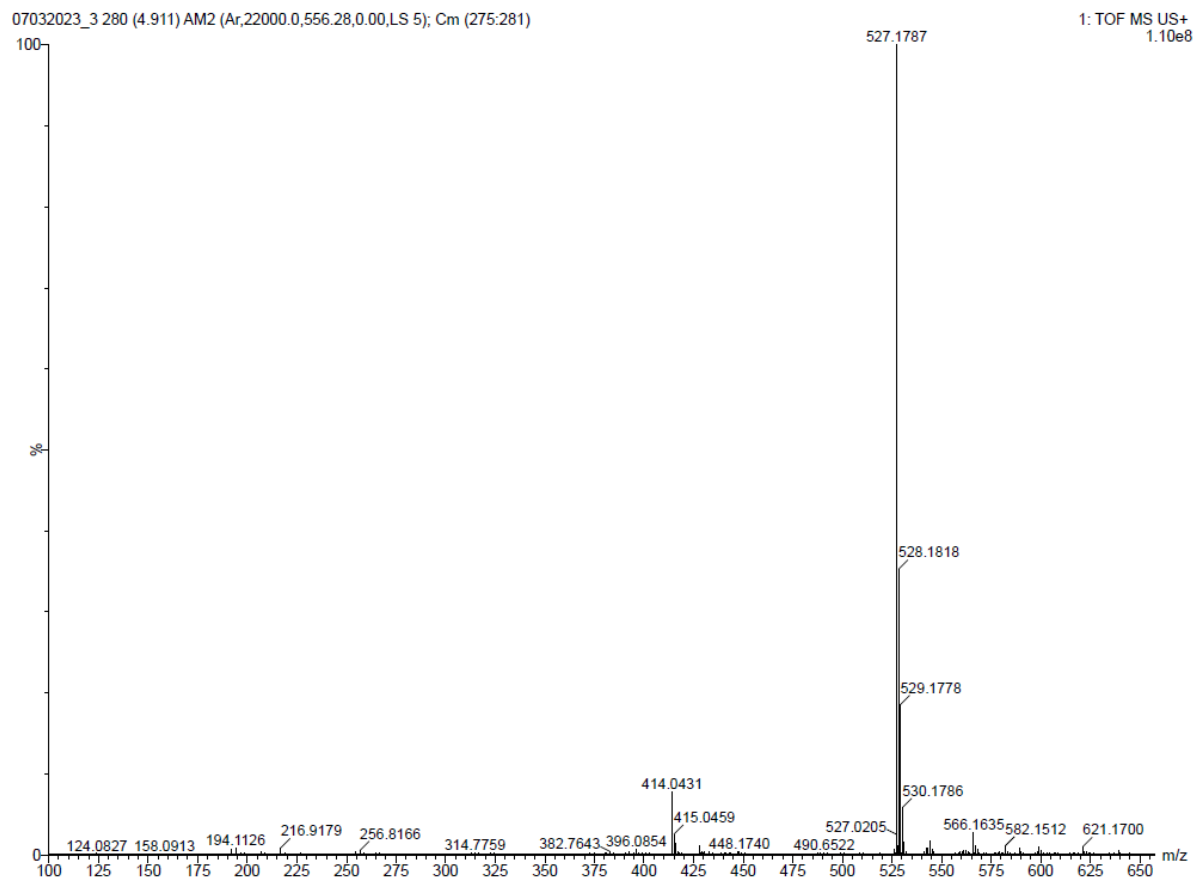

Fig. S6: MALDI-TOF data of compound 4

1H\_CHO-Th-PTZ-Th-CHO.esp

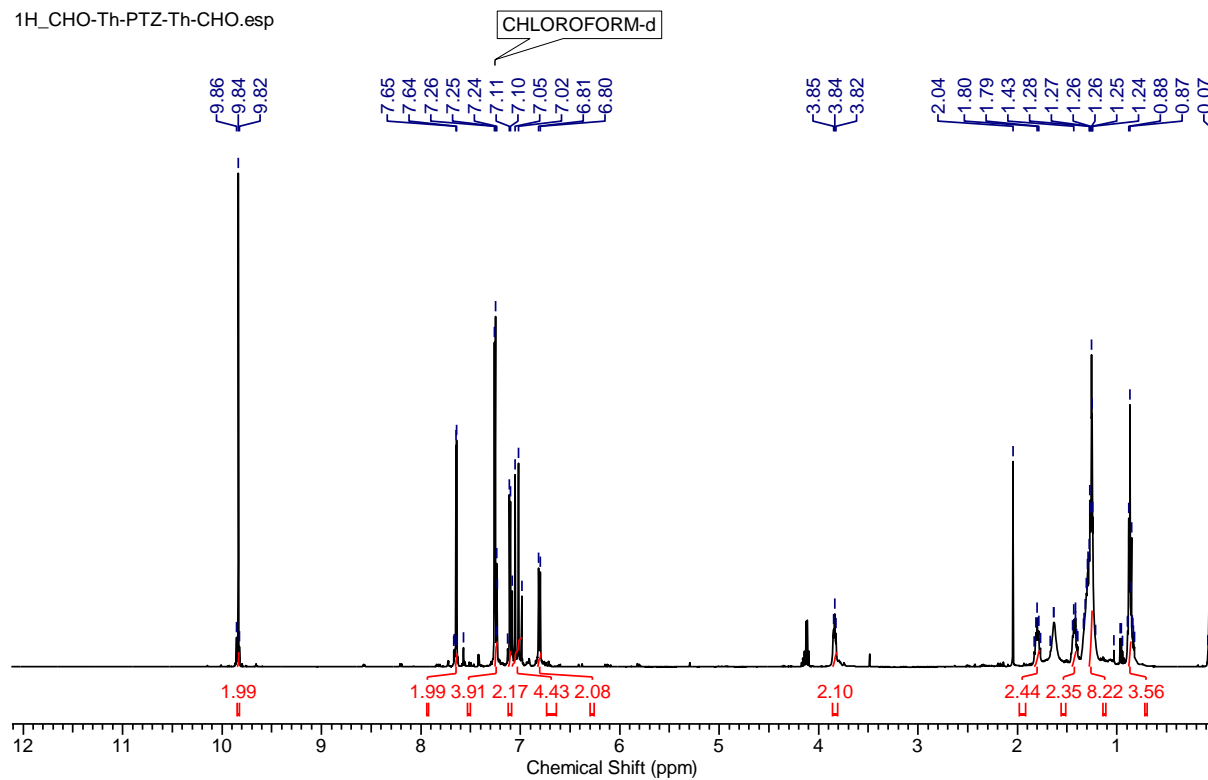

Fig. S7:  $^1\text{H}$ -NMR data of compound 5

13C\_CHO-Th-PTZ-Th-CHO.esp

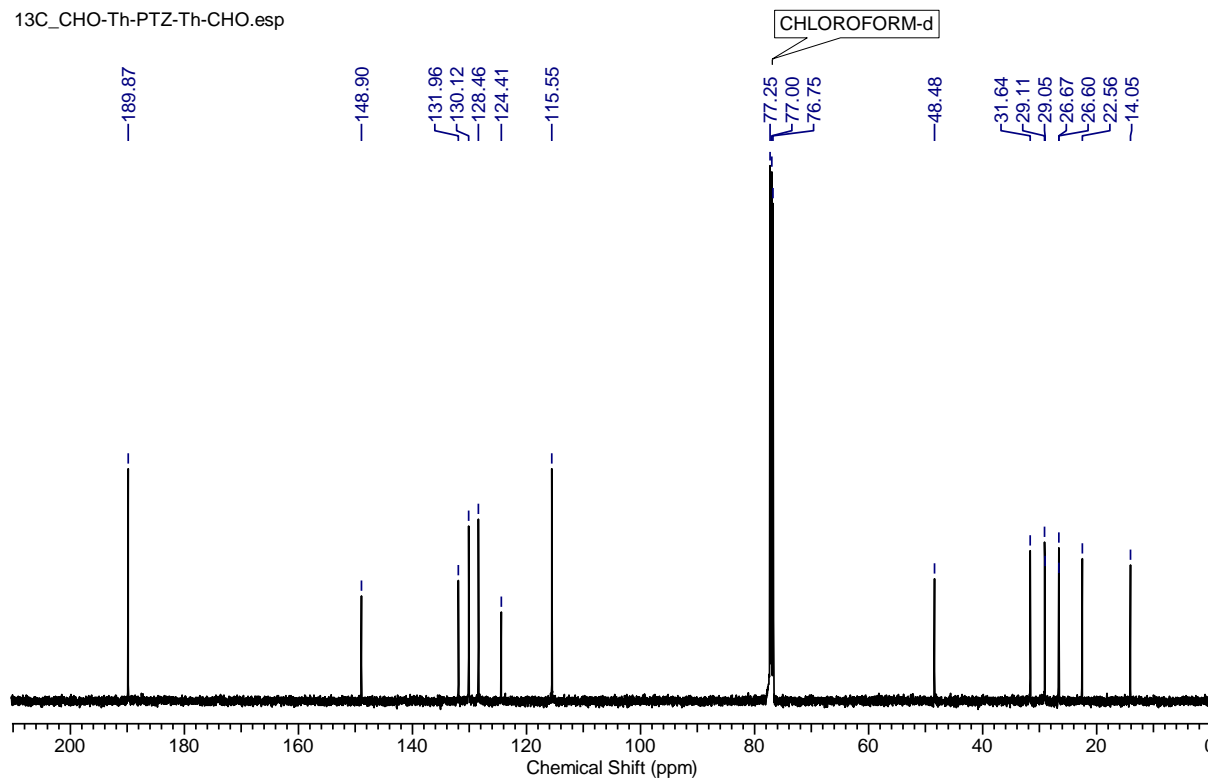

Fig. S8:  $^{13}\text{C}$ -NMR data of compound 5

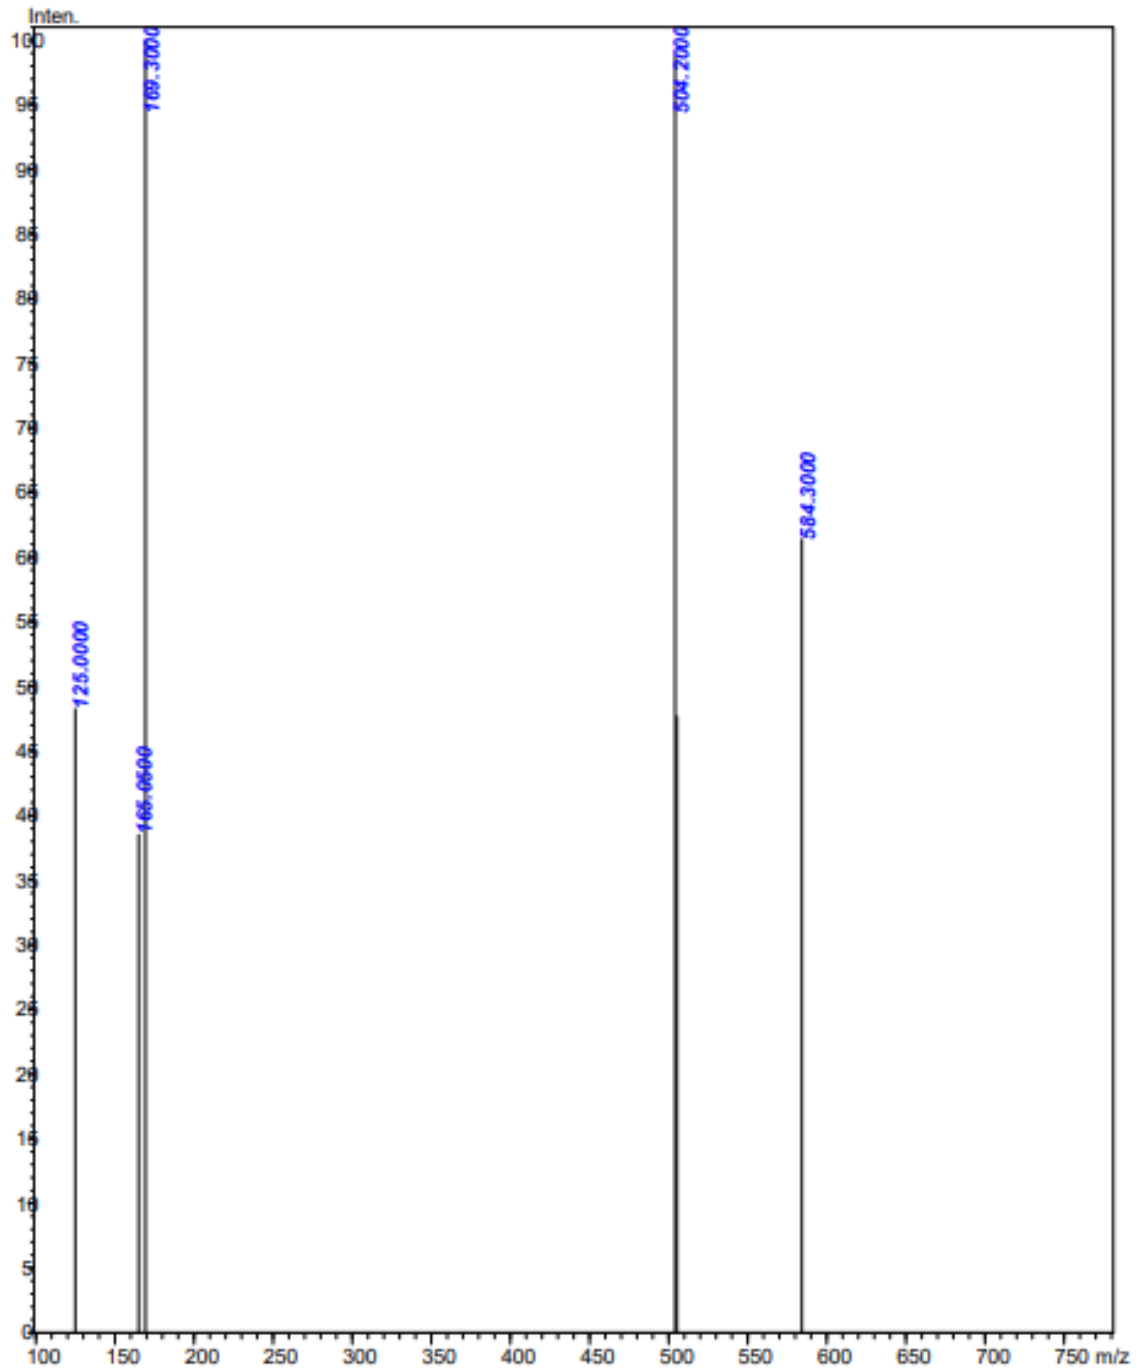

Fig. S9: HPLC-MS data of compound 5

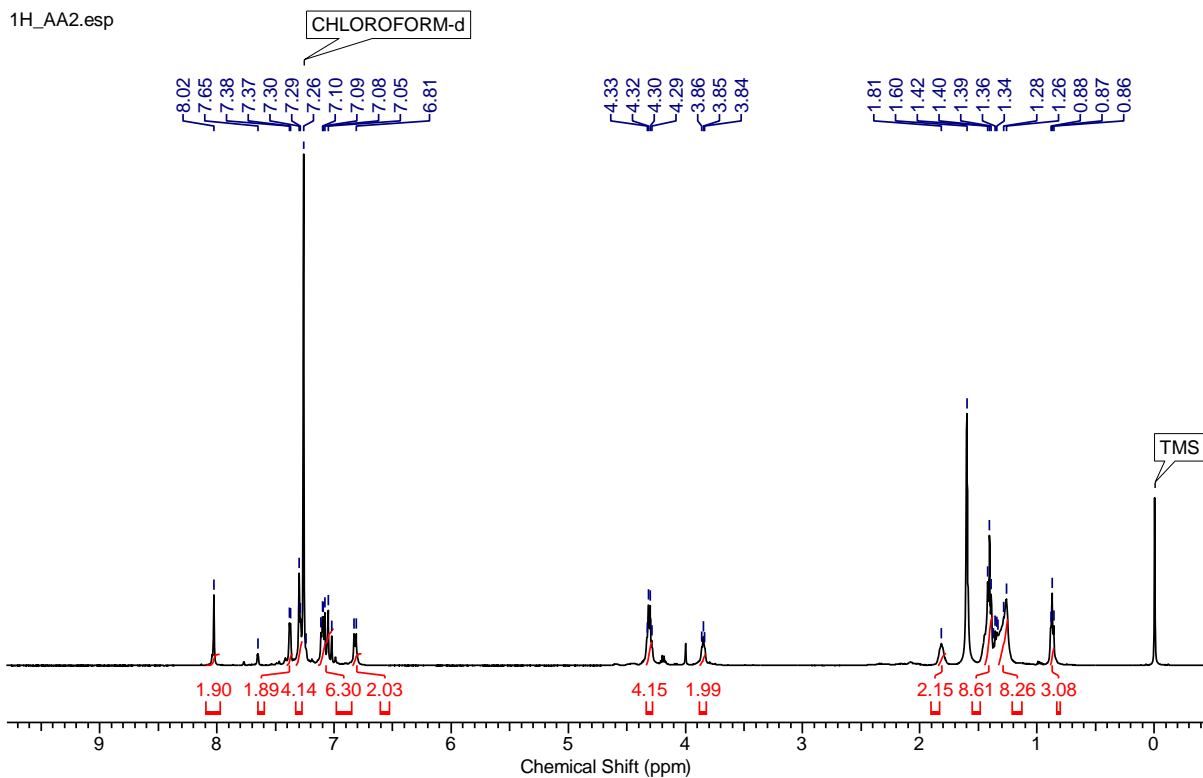

Fig. S10: <sup>1</sup>H-NMR data of compound AA2

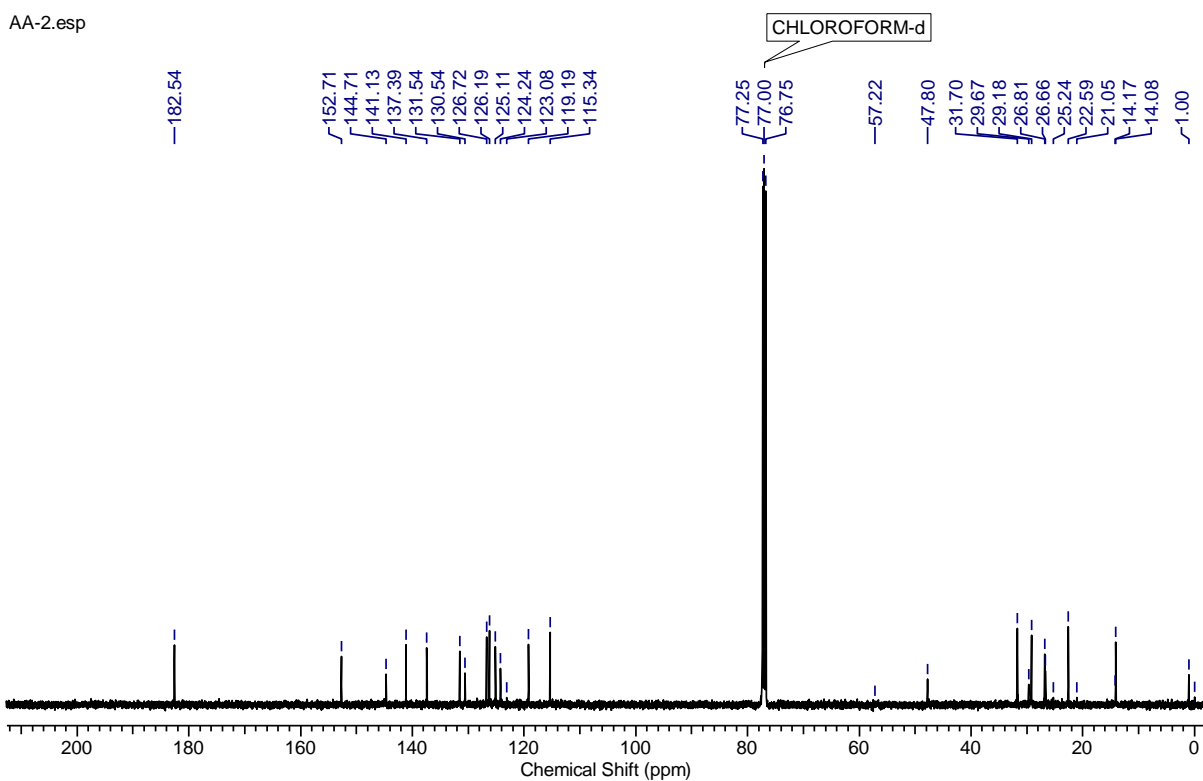

Fig. S11: <sup>13</sup>C-NMR data of compound AA2

Comment 1  
Comment 2

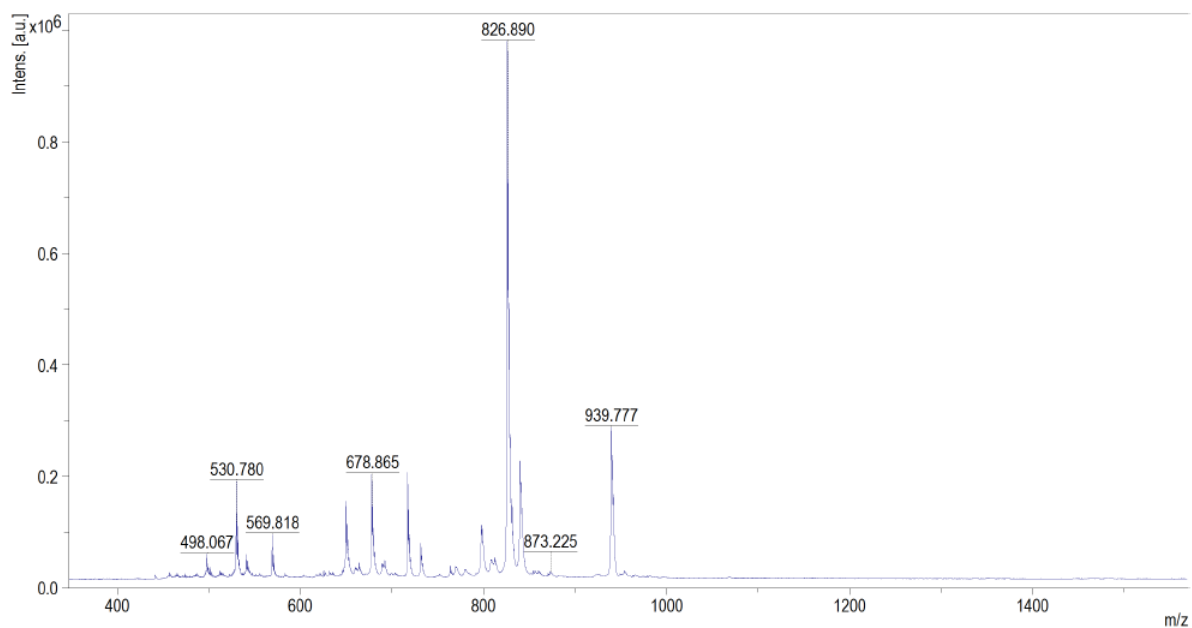

Fig. S12: MALDI-TOF data of compound AA2

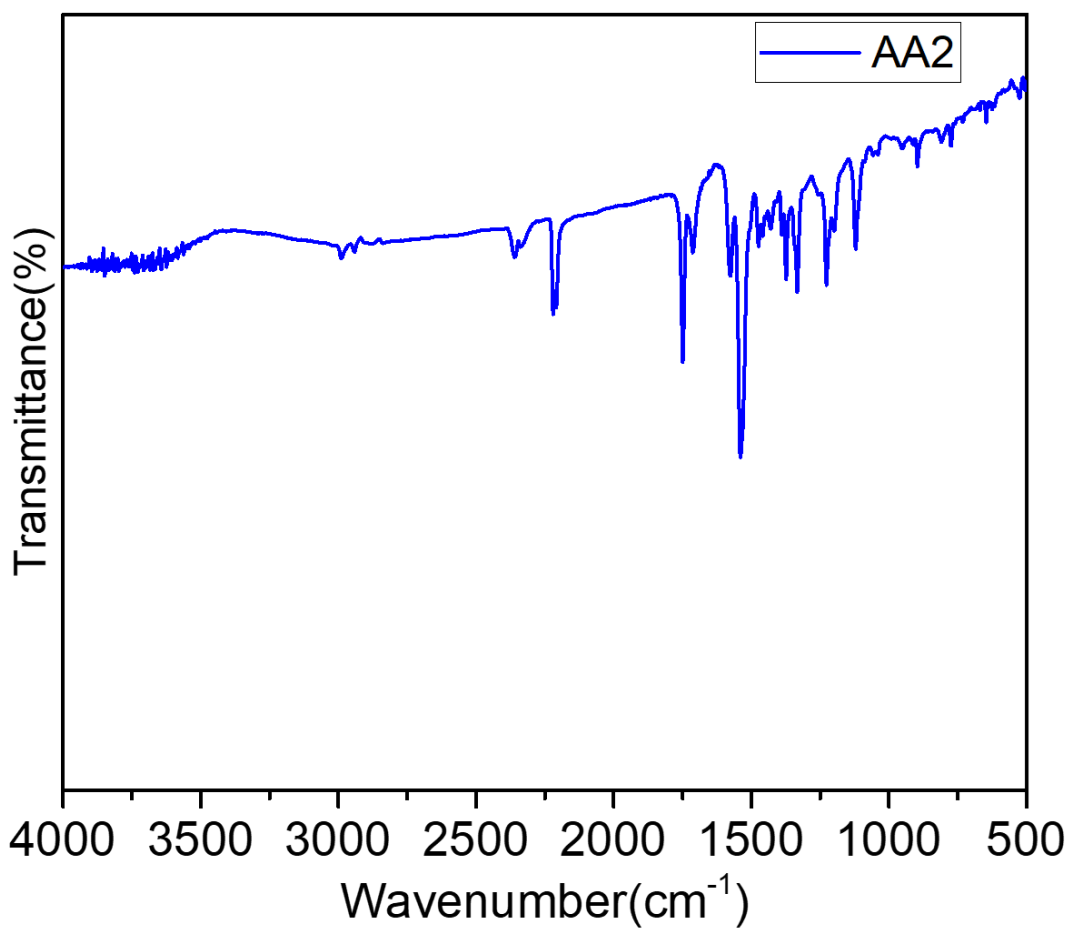

Fig. S13. FT-IR data of compound AA2



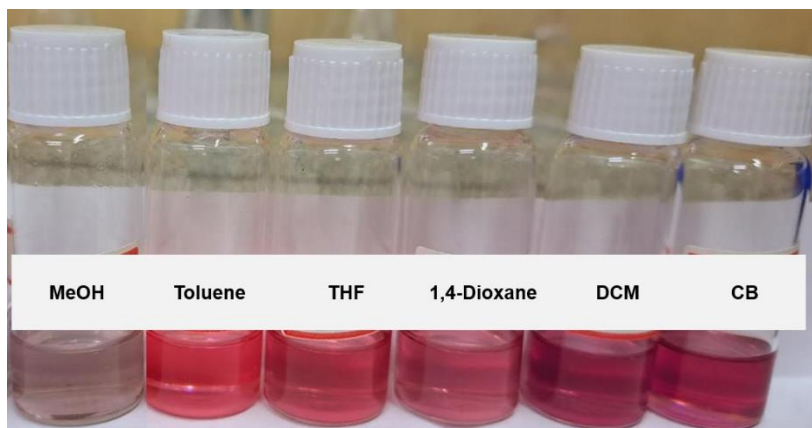

Fig. S14. Digital photograph of AA2 molecule dissolved in different solvents.

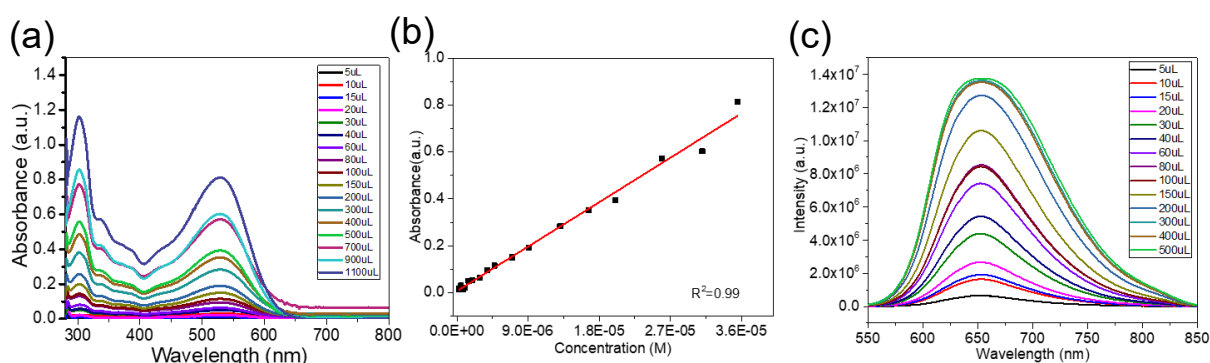

Fig. S15. AA2 molecule in toluene at various concentrations ranging from  $10^{-5}$  to  $10^{-7}$  M at room temperature. (a) UV-vis absorption spectra, (b) corresponding linear graph and (c) PL emission spectra.

### Relative fluorescence quantum yield of the compound AA2

The relative fluorescence quantum yield of the compound AA2 in different solvents was studied in this context. To identify the relative fluorescence quantum yield of AA2, Nile blue (NB) was chosen as the standard reference with fluorescence quantum yield of 0.27 at excitation wavelength of 540 nm in the medium of methanol. Based on the equation shown below, we calculated the quantum yield.

$$\Phi_S = \Phi_R \times \frac{A_R}{A_S} \times \frac{I_S}{I_R} \times \frac{\eta_S^2}{\eta_R^2}$$

Where,  $\Phi_S$  denoted as sample quantum yield,  $\Phi_R$  mentioned as reference quantum yield,  $A_R$  referred as absorbance of the reference,  $A_S$  as the absorbance of sample,  $I_S$  as the area under the fluorescence curve of the sample,  $I_R$  as the area under the fluorescence curve of the reference,  $\eta_S$  as the solvent refractive index of the sample and  $\eta_R$  as the solvent refractive index of the reference.

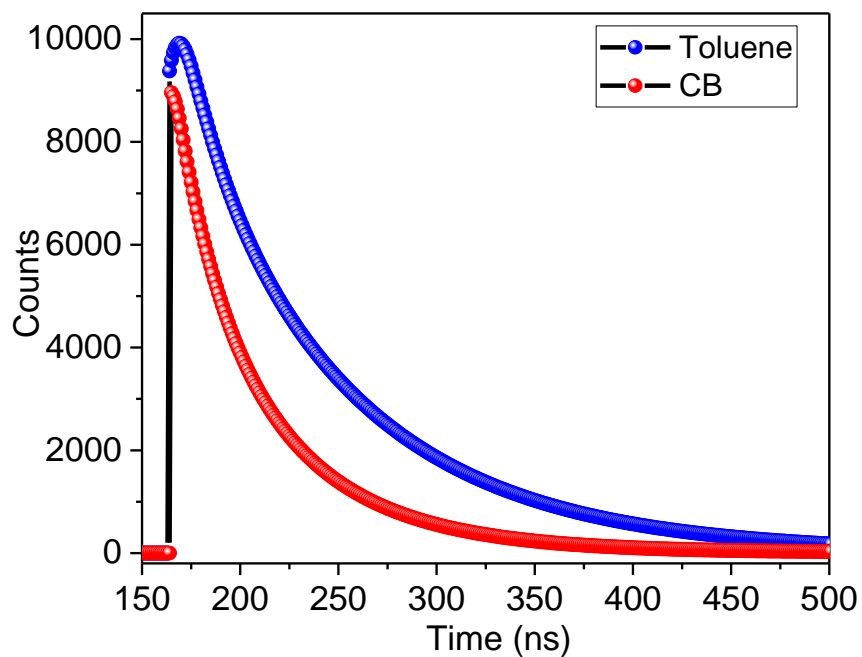

Fig. S16. Time-resolved photoluminescence (TRPL) profile of AA2 in different solvents

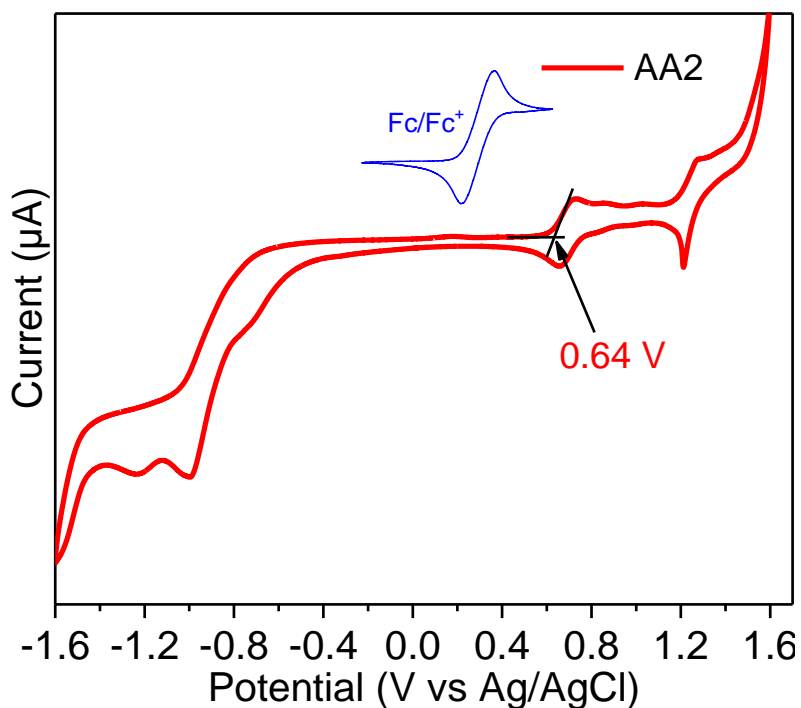

Fig. S17. Cyclic voltammetry of AA2 in dry DCM using the supporting electrolyte of *n*-butylammonium hexafluorophosphate (0.1 M NBu<sub>4</sub>PF<sub>6</sub>).

**Table S1** Comparison of simulated absorption and emission wavelengths (nm) and HOMO-LUMO gap (eV) for AA2 molecule using different methods

| Methods                | $\lambda_{max}$<br>(absorption)<br>(nm) | $\lambda_{max}$<br>(emission)<br>(nm) | HOMO<br>(eV) | LUMO<br>(eV) | HOMO-LUMO<br>gap |
|------------------------|-----------------------------------------|---------------------------------------|--------------|--------------|------------------|
| B3LYP/6-31G**          | 1005                                    | 1222                                  | -5.02        | -2.93        | 2.09             |
| CAM-B3LYP/6-31G**      | 495                                     | 642                                   | -6.17        | -1.83        | 4.33             |
| $\omega$ B97XD/6-31G** | 423                                     | 596                                   | -6.77        | -1.36        | 5.41             |
| B3LYP/6-31+G*          | 1105                                    | 1317                                  | -5.24        | -3.22        | 2.01             |
| CAM-B3LYP/6-31+G*      | 508                                     | 663                                   | -6.37        | -2.12        | 4.25             |
| B3LYP/6-311G           | 712                                     | 1126                                  | -5.34        | -3.31        | 2.03             |
| CAM-B3LYP/6-311G       | 505                                     | 639                                   | -6.47        | -2.20        | 4.27             |

Cartesian coordinates for the optimized geometries of AA2 in ground ( $S_0$ ) and excited ( $S_1$ ) states at CAM-B3LYP/6-31+G\* level of theory using  $\text{CHCl}_3$  as solvent:

AA2 ( $S_0$ )

107

```

C      1.29180000    2.43007800   -1.43157000
C      2.43953700    3.12544200   -1.01753000
C      3.65189000    2.48191400   -0.82758300
C      3.78179500    1.10154000   -1.01408300
C      2.63919500    0.40662300   -1.42758400
C      1.43326100    1.05150300   -1.66105200
H      2.39872200    4.18996400   -0.83620400
H      4.50174700    3.07812000   -0.51248200
H      2.69866100   -0.66498300   -1.59886300
C     -3.54262200    2.39323200   -0.97995600
C     -2.34046800    3.06737900   -1.12200800
C     -1.15860400    2.40017200   -1.48381300
C     -1.25568300    1.01807700   -1.71620200
C     -2.45330500    0.34307300   -1.53061800
C     -3.62899800    1.00921100   -1.16499100
H     -4.42030300    2.96822000   -0.70422000
H     -2.33517900    4.13346400   -0.94487600
H     -2.47841700   -0.73001600   -1.70092800
S      0.11466500    0.13094700   -2.40139300
N      0.06188000    3.08293500   -1.62586700
C      0.04411300    4.54705800   -1.69035400
H     -0.81827400    4.83236200   -2.29948300
C      0.00300200    5.29570000   -0.35159700
H      0.88021200    5.04337100    0.25302300
H     -0.86284800    4.97492000    0.23689000

```

|   |              |             |             |
|---|--------------|-------------|-------------|
| C | -0.05393600  | 6.80823300  | -0.56380000 |
| H | -0.94064900  | 7.05949200  | -1.16267400 |
| H | 0.92425400   | 4.85680600  | -2.26088600 |
| H | 0.81547800   | 7.12738000  | -1.15560100 |
| C | -0.08974200  | 7.59688400  | 0.74459900  |
| H | -0.95809900  | 7.27651300  | 1.33706600  |
| H | 0.79810000   | 7.34773300  | 1.34238500  |
| C | -0.15053200  | 9.10952500  | 0.53739800  |
| H | -1.03862600  | 9.35804300  | -0.06075500 |
| H | 0.71778300   | 9.42940300  | -0.05584700 |
| C | -0.18638900  | 9.89999200  | 1.84446800  |
| H | -1.05436500  | 9.58024800  | 2.43858400  |
| H | 0.70189900   | 9.65258500  | 2.44307100  |
| C | -0.24826100  | 11.41306300 | 1.63968400  |
| H | -1.13585700  | 11.66045000 | 1.04201100  |
| H | 0.61918900   | 11.73294000 | 1.04686900  |
| C | -0.28421600  | 12.19311400 | 2.95217800  |
| H | -0.32875700  | 13.27313500 | 2.77601000  |
| H | -1.15962100  | 11.91636100 | 3.55129100  |
| H | 0.60794600   | 11.99007200 | 3.55607800  |
| C | -4.85873600  | 0.23533100  | -1.00459200 |
| C | -6.06973300  | 0.71004700  | -0.66038200 |
| H | -4.74965500  | -0.83199500 | -1.18714000 |
| H | -6.20080400  | 1.77259600  | -0.47354000 |
| C | -7.25821300  | -0.10983800 | -0.50999400 |
| C | -7.42569800  | -1.47384700 | -0.67528700 |
| S | -8.74997900  | 0.62789300  | -0.05326300 |
| C | -8.73680700  | -1.91640800 | -0.43655700 |
| H | -6.62082200  | -2.14011400 | -0.96140400 |
| C | -9.60788600  | -0.89700700 | -0.08122100 |
| H | -9.05692900  | -2.94470700 | -0.51535900 |
| C | -11.00067600 | -0.85881600 | 0.24843400  |
| C | 5.02505500   | 0.35921600  | -0.81120600 |
| C | 6.21427000   | 0.86631900  | -0.43966100 |
| H | 4.94708400   | -0.71174600 | -0.98846100 |
| H | 6.31449100   | 1.93329500  | -0.25891800 |
| C | 7.42023300   | 0.07826700  | -0.25549300 |
| C | 7.62704700   | -1.28041200 | -0.40999300 |
| S | 8.88307300   | 0.85997600  | 0.22974700  |
| C | 8.94774300   | -1.68015600 | -0.14034800 |
| H | 6.84887300   | -1.97140300 | -0.71012100 |
| C | 9.77848800   | -0.63446100 | 0.22618700  |
| H | 9.26710800   | -2.71210100 | -0.21710400 |
| C | 11.16709000  | -0.60883100 | 0.57391900  |
| H | 11.59141700  | 0.36049400  | 0.82858100  |
| C | 12.05712600  | -1.62341200 | 0.63570400  |
| C | 13.45268200  | -1.38347200 | 1.01513200  |
| S | 11.79828600  | -3.32757100 | 0.30273800  |
| N | 14.18113900  | -2.59011400 | 1.01557600  |
| O | 13.95798000  | -0.31562500 | 1.30108500  |
| C | 13.47962700  | -3.69613300 | 0.65860100  |
| C | 13.91743500  | -5.00387200 | 0.55319500  |
| C | 12.97890700  | -6.00274400 | 0.16201200  |
| N | 12.20704000  | -6.80681400 | -0.15704700 |
| C | 15.23948700  | -5.47125400 | 0.79183800  |
| N | 16.29665600  | -5.91320400 | 0.96819100  |
| C | 15.61225800  | -2.54060200 | 1.35819200  |
| C | 16.49904000  | -2.40331300 | 0.12838700  |

|   |              |             |             |
|---|--------------|-------------|-------------|
| H | 15.85644800  | -3.42500800 | 1.94368100  |
| H | 15.72074700  | -1.67139400 | 2.00689600  |
| H | 17.54567800  | -2.36149100 | 0.44349500  |
| H | 16.38694000  | -3.25131800 | -0.55196000 |
| H | 16.26694100  | -1.48296700 | -0.41448400 |
| H | -11.35828500 | 0.14407500  | 0.47882600  |
| C | -11.95879600 | -1.81936300 | 0.33028500  |
| C | -11.87426400 | -3.25856600 | 0.10176600  |
| S | -13.61523200 | -1.38374800 | 0.78107900  |
| O | -10.89465300 | -3.91026200 | -0.21399000 |
| N | -13.13222200 | -3.86932100 | 0.29224000  |
| C | -13.22982200 | -5.32665000 | 0.11059100  |
| C | -13.03014900 | -6.08936900 | 1.41299800  |
| H | -12.44783300 | -5.58079600 | -0.60469700 |
| H | -14.18912800 | -5.55025600 | -0.35205900 |
| H | -13.11098500 | -7.16247200 | 1.21686100  |
| H | -12.03897800 | -5.89032800 | 1.82965900  |
| H | -13.78492500 | -5.82656700 | 2.15859900  |
| C | -14.14481800 | -3.04277400 | 0.66041600  |
| C | -15.46741900 | -3.35970200 | 0.93081600  |
| C | -16.04903300 | -4.65601400 | 0.89810500  |
| N | -16.58142300 | -5.68635200 | 0.89275700  |
| C | -16.35155200 | -2.30265600 | 1.29029900  |
| N | -17.05997600 | -1.43186800 | 1.58165200  |

#### AA2 (S<sub>1</sub>)

107

|   |             |             |             |
|---|-------------|-------------|-------------|
| C | 1.28344800  | 2.19227900  | -1.19928300 |
| C | 2.44041000  | 2.93832800  | -0.90442200 |
| C | 3.66790400  | 2.33293200  | -0.72033900 |
| C | 3.81486300  | 0.93990300  | -0.80338000 |
| C | 2.66460500  | 0.19660100  | -1.08818900 |
| C | 1.43108000  | 0.79721400  | -1.29717200 |
| H | 2.38986400  | 4.01269400  | -0.80260100 |
| H | 4.51984200  | 2.96538700  | -0.49643300 |
| H | 2.73619700  | -0.88503800 | -1.16414400 |
| C | -3.58277000 | 2.24825100  | -0.93519200 |
| C | -2.37717000 | 2.88522200  | -1.08424300 |
| C | -1.16713300 | 2.16914600  | -1.26955200 |
| C | -1.26930300 | 0.75139300  | -1.33146200 |
| C | -2.47663200 | 0.11871600  | -1.15246800 |
| C | -3.68520500 | 0.83070400  | -0.94826700 |
| H | -4.46674200 | 2.85832300  | -0.78875900 |
| H | -2.36928300 | 3.96430000  | -1.03450400 |
| H | -2.51085500 | -0.96644300 | -1.19497000 |
| S | 0.10478300  | -0.23549900 | -1.82614700 |
| N | 0.04245500  | 2.82643500  | -1.38204700 |
| C | 0.03408100  | 4.28692200  | -1.57712300 |
| H | -0.80958600 | 4.52348900  | -2.22797400 |
| C | -0.03278300 | 5.11675100  | -0.29186300 |
| H | 0.83444500  | 4.90105200  | 0.34135800  |
| H | -0.91125700 | 4.82788000  | 0.29511000  |
| C | -0.08796200 | 6.61263200  | -0.60036000 |
| H | -0.96388900 | 6.82303600  | -1.22957300 |
| H | 0.92659100  | 4.54143100  | -2.15105900 |
| H | 0.79198400  | 6.89697000  | -1.19384300 |
| C | -0.15045700 | 7.47870400  | 0.65705900  |

|   |              |             |             |
|---|--------------|-------------|-------------|
| H | -1.02785000  | 7.19032700  | 1.25236300  |
| H | 0.72785800   | 7.27170800  | 1.28407300  |
| C | -0.21481200  | 8.97513700  | 0.35509000  |
| H | -1.09298700  | 9.18049800  | -0.27320300 |
| H | 0.66275200   | 9.26302600  | -0.24082600 |
| C | -0.27911900  | 9.84432200  | 1.60999700  |
| H | -1.15580400  | 9.55570100  | 2.20714100  |
| H | 0.59967700   | 9.64091900  | 2.23839100  |
| C | -0.34664600  | 11.34125000 | 1.31030100  |
| H | -1.22460700  | 11.54436100 | 0.68250800  |
| H | 0.52960300   | 11.63012500 | 0.71453300  |
| C | -0.41180900  | 12.20086700 | 2.57088900  |
| H | -0.45956400  | 13.26744800 | 2.32695700  |
| H | -1.29658600  | 11.95565600 | 3.16992200  |
| H | 0.47014700   | 12.04220000 | 3.20240700  |
| C | -4.89687700  | 0.11643300  | -0.78231700 |
| C | -6.15503000  | 0.67239800  | -0.58552100 |
| H | -4.81488300  | -0.96699400 | -0.81957200 |
| H | -6.24666900  | 1.75434600  | -0.54951100 |
| C | -7.33553500  | -0.06070100 | -0.42959500 |
| C | -7.52826400  | -1.46732700 | -0.42628800 |
| S | -8.87632900  | 0.74174900  | -0.19564500 |
| C | -8.83037500  | -1.86557000 | -0.24703600 |
| H | -6.70857000  | -2.16429100 | -0.55440100 |
| C | -9.74788400  | -0.79056200 | -0.09969000 |
| H | -9.16871500  | -2.89170200 | -0.21269700 |
| C | -11.13299100 | -0.74996000 | 0.08274200  |
| C | 5.07831900   | 0.23705300  | -0.61468500 |
| C | 6.27285000   | 0.79336700  | -0.33372800 |
| H | 5.01721600   | -0.84404000 | -0.72028000 |
| H | 6.35407100   | 1.87142000  | -0.22266700 |
| C | 7.50352900   | 0.04687500  | -0.16354800 |
| C | 7.73643700   | -1.31442000 | -0.25477200 |
| S | 8.96882700   | 0.88646700  | 0.20710600  |
| C | 9.07730900   | -1.66889200 | -0.03089800 |
| H | 6.96203700   | -2.03801300 | -0.47815600 |
| C | 9.89892800   | -0.58564300 | 0.23714500  |
| H | 9.41834100   | -2.69614200 | -0.06495300 |
| C | 11.30200300  | -0.51106900 | 0.51145300  |
| H | 11.71132500  | 0.47676200  | 0.71408700  |
| C | 12.22287700  | -1.49912300 | 0.55509000  |
| C | 13.62900300  | -1.20888400 | 0.85287500  |
| S | 11.99920200  | -3.21744700 | 0.27710500  |
| N | 14.39397100  | -2.39206200 | 0.83685000  |
| O | 14.11468600  | -0.11991500 | 1.08909900  |
| C | 13.70947600  | -3.52658300 | 0.54151700  |
| C | 14.18218000  | -4.82184400 | 0.43467100  |
| C | 13.25460200  | -5.85717800 | 0.11946700  |
| N | 12.49082300  | -6.69074500 | -0.13720700 |
| C | 15.53087400  | -5.24246800 | 0.60037900  |
| N | 16.61074000  | -5.64717700 | 0.71896800  |
| C | 15.83934700  | -2.29152800 | 1.09960800  |
| C | 16.65296900  | -2.14326900 | -0.17855600 |
| H | 16.14334900  | -3.15929300 | 1.68187300  |
| H | 15.95469700  | -1.41013200 | 1.73049800  |
| H | 17.71357300  | -2.06756200 | 0.07804200  |
| H | 16.52903500  | -3.00197500 | -0.84320200 |
| H | 16.36473900  | -1.23634600 | -0.71708600 |

|   |              |             |             |
|---|--------------|-------------|-------------|
| H | -11.54563400 | 0.25599600  | 0.13812500  |
| C | -12.09134600 | -1.75961000 | 0.20115900  |
| C | -11.97307400 | -3.19024300 | 0.21427800  |
| S | -13.77515900 | -1.29324800 | 0.38532000  |
| O | -10.96313200 | -3.89056800 | 0.12308900  |
| N | -13.25552500 | -3.79400600 | 0.35558300  |
| C | -13.32643800 | -5.26035300 | 0.40245700  |
| C | -13.27795300 | -5.79743000 | 1.82669800  |
| H | -12.46318100 | -5.60849900 | -0.16446200 |
| H | -14.22516400 | -5.57940300 | -0.12251300 |
| H | -13.32884700 | -6.89009900 | 1.80354900  |
| H | -12.34404200 | -5.50650800 | 2.31539300  |
| H | -14.11700200 | -5.43422600 | 2.42600400  |
| C | -14.30179600 | -2.94975100 | 0.46984300  |
| C | -15.66035400 | -3.24115500 | 0.63367300  |
| C | -16.23389100 | -4.53294800 | 0.73866100  |
| N | -16.76004400 | -5.56409500 | 0.83375900  |
| C | -16.57542300 | -2.15800700 | 0.71611400  |
| N | -17.31208200 | -1.26265300 | 0.78215400  |

**Table S2** Comparison of Inorganic & Nanostructured based Optical limiters under Nanosecond pulse Excitation<sup>1</sup>

| S.No | Molecule name/<br>configuration | Concentration/<br>Solvent | Linear Transmittance (LT) /<br>Laser Wavelength / Pulse-width | Optical Limiting Threshold &<br><i>undesirable</i> LT<br>“⊗” |
|------|---------------------------------|---------------------------|---------------------------------------------------------------|--------------------------------------------------------------|
| 1.   | SWNT-Carbon Nanotubes           | CHCl <sub>3</sub>         | 13%<br>532 nm/<br>5 ns                                        | 0.04 J/cm <sup>2</sup><br>⊗                                  |
| 2.   | PbPc(β-CP) <sub>4</sub>         | CHCl <sub>3</sub>         | 62%<br>532 nm/<br>8 ns                                        | 0.07 J/cm <sup>2</sup><br>⊗                                  |
| 3.   | SWNT-Carbon Nanotubes           | H <sub>2</sub> O          | 24%<br>532 nm/<br>5 ns                                        | 0.15 J/cm <sup>2</sup><br>⊗                                  |
| 4.   | Aq GO                           | -                         | 70 %<br>532 nm/<br>35 ns                                      | 0.2 J/cm <sup>2</sup>                                        |
| 5.   | Fullerene - C <sub>60</sub>     | Toluene                   | 65 %<br>532 nm/<br>5 ns                                       | 0.2 J/cm <sup>2</sup><br>⊗                                   |
| 6.   | Gold Nanoparticles              | H <sub>2</sub> O          | 532 nm/<br>14 ns                                              | 0.2 J/cm <sup>2</sup>                                        |
| 7.   | Mentho-C <sub>60</sub> -Benzoyl | Toluene                   | 70 %<br>532 nm/<br>5 ns                                       | 0.35 J/cm <sup>2</sup>                                       |
| 8.   | Ag Nps/ rGO                     | -                         | 80 %<br>532 nm/<br>10 ns                                      | 0.38 J/cm <sup>2</sup>                                       |



|    |                          |                           |                                   |                              |
|----|--------------------------|---------------------------|-----------------------------------|------------------------------|
| 9  | CBS                      | H <sub>2</sub> O          | 40 %<br>532 nm/<br>20 ns          | 1 J/cm <sup>2</sup> ⊗        |
| 10 | Gold NWs                 | -                         | 70%<br>532 nm/<br>7 ns            | 1.56 J/cm <sup>2</sup>       |
| 11 | WSe <sub>2</sub>         | -                         | 55.1 %<br>532 nm/<br>6 ns         | 7.2 J/cm <sup>2</sup><br>⊗   |
| 12 | Graphite                 | -                         | 79.7 %<br>532 nm/<br>6 ns         | 15.15 J/cm <sup>2</sup>      |
| 13 | <b>AA2<br/>A-π-D-π-A</b> | <b>0.5 mM<br/>Toluene</b> | <b>75 %<br/>532 nm/<br/>20 ns</b> | <b>0.98 J/cm<sup>2</sup></b> |

#### References

- 1 R. Gadhwal and A. Devi, *Opt. Laser Technol.*, 2021, **141**, 107144.
